# Supplementary material for: Identifying and Avoiding tcDNA-ASO Sequence-Specific Toxicity for the Development of DMD Exon 51 Skipping Therapy
Source: PubMed Central journal article supplement (PMC7063478; doi:10.1016/j.omtn.2019.11.020), 2019-11-27
Supplement: mmc1.pdf [file mmc1.pdf]

## **Supplemental Information**

### **Identifying and Avoiding tcDNA-ASO**

#### **Sequence-Specific Toxicity for the**

#### **Development of DMD Exon 51 Skipping Therapy**

**Philippine Aupy, Lucía Echevarría, Karima Relizani, Faouzi Zarrouki, Adrian Haerberli, Marek KomisarSKI, Thomas Tensorer, Grégory Jouvion, Fedor Svinartchouk, Luis Garcia, and Aurélie Goyenvalle**

SUPPLEMENTAL MATERIAL

Figure S1

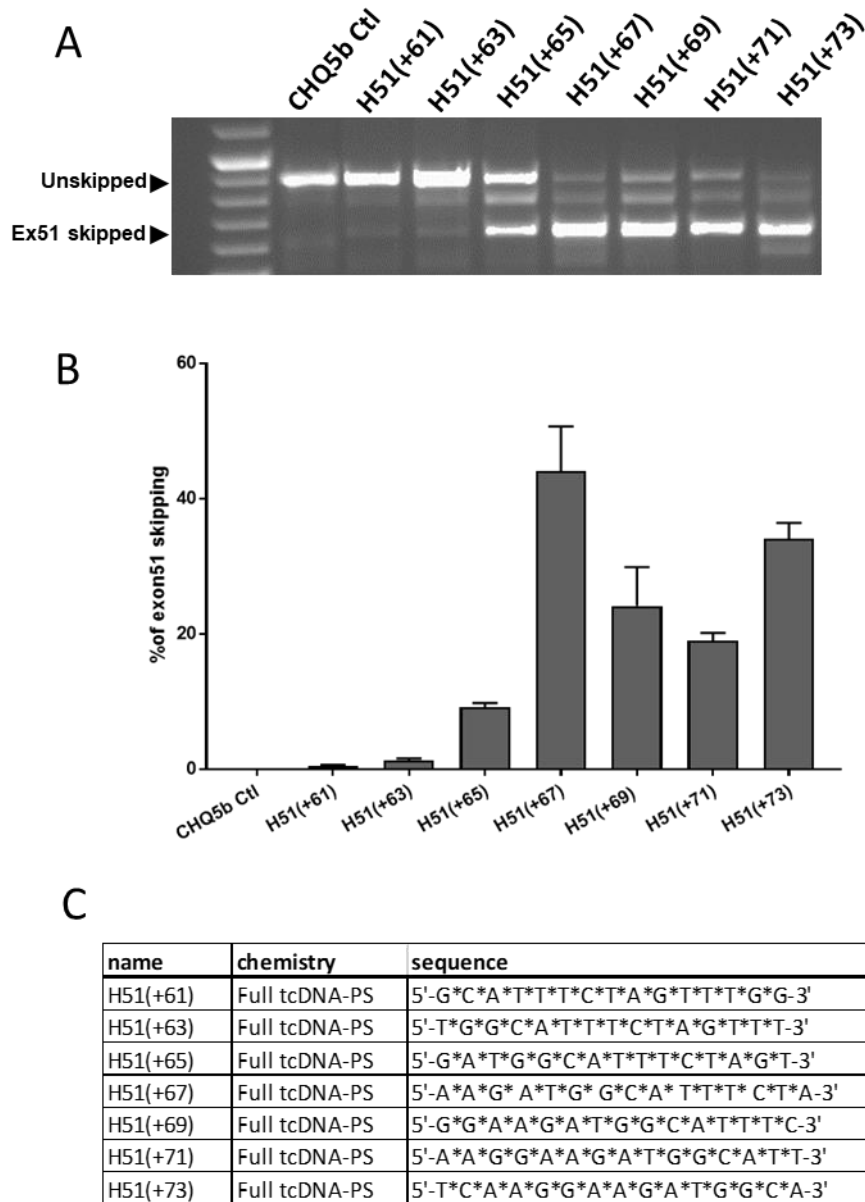

**Figure S1:** In vitro screening of tcDNA efficacy. 300nm of the different tcDNA-ASOs were transfected in the human-derived skeletal muscle cell line CHQ5b and levels of exon 51 skipping were determined by qRT-PCR. A- representative gel of a transfection experiment. B- quantification by qRT-PCR of 3 transfection experiments. Results are expressed as Mean ± SEM. C- Sequence and chemistry of the tested compounds.

**Figure S2**

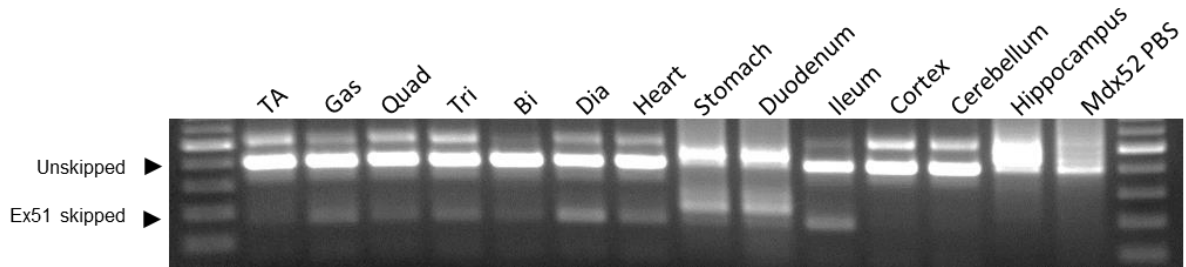

**Figure S2:** Evaluation of exon 51 skipping following H51(+67)W treatment. Representative gel showing exon 51 levels evaluated by RT-PCR in treated *mdx52* tissues 2 weeks after the end of the 12-week treatment at 200mg/kg/week. TA: tibialis anterior, Gas: Gastrocnemius, Quad: quadriceps, Tri: triceps, Bi: biceps, Dia: diaphragm.

**Figure S3**

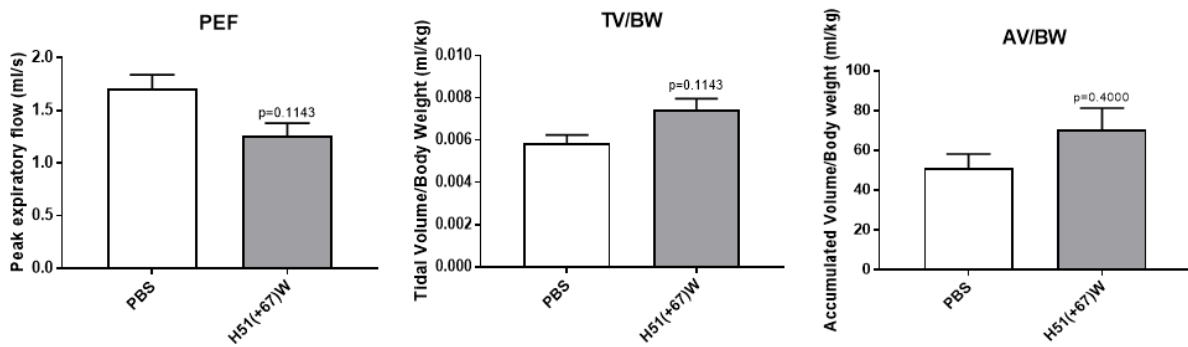

**Figure S3: H51(+67)W treatment tends to improve respiratory function.** Whole Body plethysmography was performed on PBS treated *mdx52* (n=3) and H51(+67)W treated *mdx52* (n=4) one week after the end of treatment. Different parameters were measured: Peak Expiratory Flow (PEF) (left), Tidal Volume normalized on Body Weight (TV/BW) (center) and Accumulated Volume Normalized on Body Weight (AV/BW) (right). Results are expressed as Mean  $\pm$  SEM. P values are indicated for H51(+67)W treated *mdx52* compared to PBS.

**Figure S4**

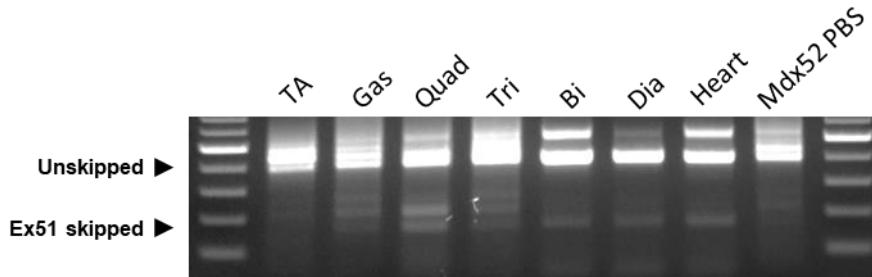

**Figure S4: Evaluation of exon 51 skipping after 16 weeks of washout following H51(+67)W treatment.** Representative gel showing exon 51 levels evaluated by RT-PCR in treated *mdx52* tissues 16 weeks after the end of the 12-week treatment at 200mg/kg/week. TA: tibialis anterior, Gas: Gastrocnemius, Quad: quadriceps, Tri: triceps, Bi: biceps, Dia: diaphragm.

**Table S1**

| <b>Amount for</b>           | <b>1% Efficacy (1%EA)</b>          | <b>TA</b>   | <b>Gas</b> | <b>Quad</b> | <b>Tri</b> | <b>Dia</b> | <b>Heart</b> | <b>Mean</b> |
|-----------------------------|------------------------------------|-------------|------------|-------------|------------|------------|--------------|-------------|
| Analysis <b>2wks</b><br>WO  | Quantity (µg/g)                    | 47,5        | 23,3       | 47,6        | 43,6       | 100,6      | 57,2         |             |
|                             | Efficacy (%ex51 skipping)          | 4,6         | 12,3       | 10,4        | 5,1        | 15,1       | 12,6         |             |
|                             | <b>1%EA</b><br>(Quantity/Efficacy) | <b>10,3</b> | <b>1,9</b> | <b>4,6</b>  | <b>8,6</b> | <b>6,7</b> | <b>4,5</b>   | <b>6,1</b>  |
|                             |                                    |             |            |             |            |            |              |             |
| Analysis <b>16wks</b><br>WO | Quantity (µg/g)                    | 1,7         | 5,2        | 5,9         | 3,3        | 11,3       | 14,2         |             |
|                             | Efficacy (%ex51 skipping)          | 1,9         | 5,4        | 3,3         | 2,0        | 4,7        | 2,0          |             |
|                             | <b>1%EA</b><br>(Quantity/Efficacy) | <b>0,9</b>  | <b>1,0</b> | <b>1,8</b>  | <b>1,6</b> | <b>2,4</b> | <b>7,1</b>   | <b>2,5</b>  |

**Table S1: 1%EA calculation.** The 1%EA corresponds to the amount of H51(+67)W ASO required to achieve 1% of exon 51 skipping and is calculated based on the values measured after 2 weeks or 16 weeks of washout (WO).
